# Supplementary material
Source: PubMed Central journal article supplement (PMC4154238)
Supplement: me-13-1405.pdf [file me-13-1405.pdf]

**Supplementary Fig. 1.** Secreted VEGF from young male fibroblasts with increasing concentrations of DHT. Young fibroblasts were treated with ethanol (EtOH), 4 nM, 40 nM and 400 nM DHT for 48 h. Conditioned media (CM) were collected after 24 h incubation with fresh phenol red-free DMEM + 10% csFBS. VEGF levels in CM were analyzed by ELISA. \*  $P < 0.05$  vs. vehicle EtOH control

**Supplementary Fig. 2.** Fibroblast cell proliferation in response to LY294002 concentrations. **A**, Cell density standard curve of proliferation assay. Fibroblasts were plated in a 24-well plate at seeding densities (625, 1250, 2500, 5000, 10000 and 20000 cells/well). **B**, Fibroblasts were seeded in 24-well plates (5000 cells/well) and were treated with 5, 10, 20, 50 and 100  $\mu$ M LY294002 in phenol red-free DMEM + 10% csFBS. Cell proliferation was assessed after 48 h using crystal violet staining. Data are presented as mean  $\pm$  SEM, n=3 performed in triplicate.

**Supplementary Fig. 3.** Standard curve of VEGF ELISA. **A**, Standard VEGF (100,000 pg/ml) provided in the ELISA kit was serially diluted according to the manufacture's protocol. Data represent the mean of technical triplicates. **B**, Standard VEGF145 (1000 pg/ml) was serially diluted according to the manufacture's protocol. Data represent the mean of technical triplicates. Standard curves were used to estimate concentrations of secreted VEGF and VEGF145 in the conditioned media from DHT-treated young fibroblasts.

**Supplementary Fig. 4.** The mRNA expression of VEGF isoforms in young fibroblasts treated with 40 nM DHT for 24 h, relative to vehicle control. **A**, Level of VEGF121 mRNA. **B**, Level of VEGF165 mRNA. **C**, Level of VEGF189 mRNA. **D**, Level of VEGF206 mRNA. n=3 donors performed in triplicate over 3 individual experiments (means  $\pm$  SEM).

**Supplementary Fig. 5.** The VEGF mRNA levels in fibroblasts treated 48 hours with vehicle control or 40 nM DHT in the presence of 10  $\mu$ M PI3-kinase inhibitor LY294002. n=3 donors performed in triplicate. Data are presented at mean  $\pm$  SEM.

**Supplementary Fig. 6.** **A**, Basal pAKT(ser473)/AKT levels in old fibroblasts, relative to young fibroblasts. n=5. Statistical analysis was performed by Students T-test. \*,  $P < 0.05$ . **B**, Relative fold change of pAKT(ser473)/AKT levels in young and old fibroblasts treated with 500 nM insulin for 15

min, normalised to untreated cells. Fibroblasts were serum starved for 2 h prior to the addition of insulin. Levels of pAKT(ser473) and AKT were analysed by western blotting. Statistic analysis was performed by 2-way ANOVA using 2-way ANOVA with Bonferroni correction. \*,  $P < 0.05$  insulin-treated young *vs.* untreated-young fibroblasts. n=3 performed in triplicate. Data are presented at mean  $\pm$  SEM.

**Supplementary Fig. 7.** The effect of DHT treatment on AR localization in fibroblasts from young men. Longer exposure of western blot demonstrating cytoplasmic (C) and nuclear (N) expression of AR following sub-cellular fractionation of fibroblasts from young men subjected to 6 h treatment with 40 nM DHT. Red pixels represent overexposure. Nuclear marker LSD1, Lamin A/C and cytoplasmic marker tubulin were used to loading control of sub-cellular fractionation of fibroblasts.

# Young fibroblast secreted VEGF

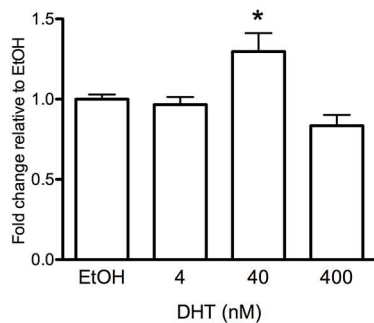

**A**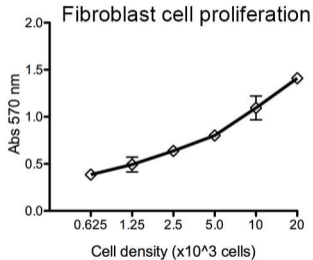**B**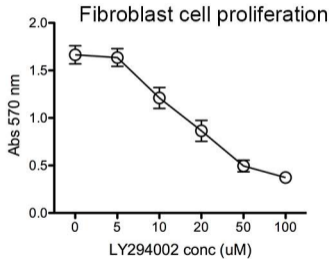

A

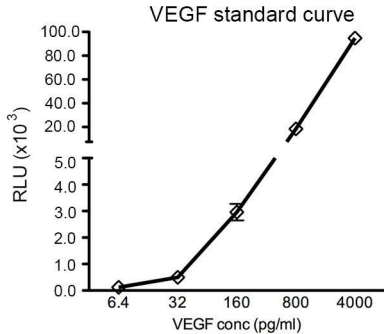

B

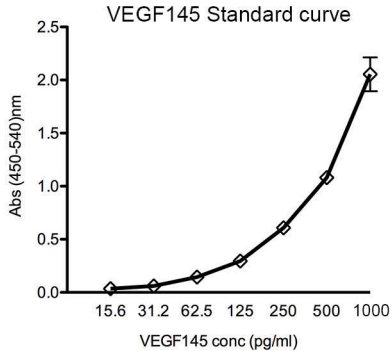

**A**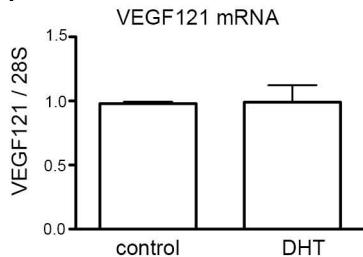**B**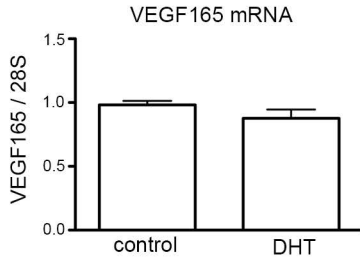**C**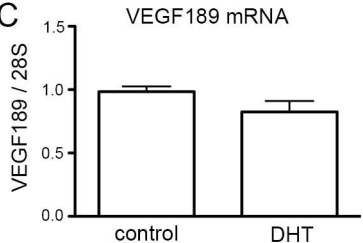**D**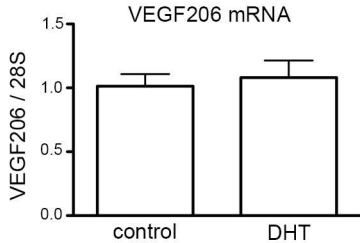

# Fibroblast VEGF mRNA

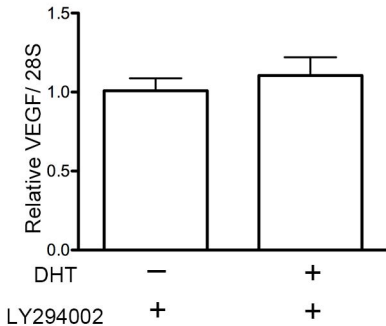

Control

DHT

C

N

C

N

AR

(110kDa)

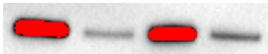

LSD1

(105kDa)

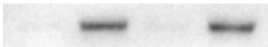

Lamin A/C

(67kDa)

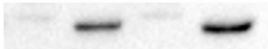

Tubulin

(50kDa)

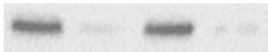

**A** Fibroblast pAKT(ser473)/AKT

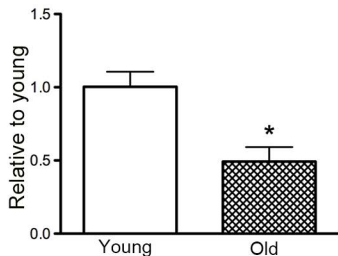

**B** Fibroblast pAKT(ser473)/AKT

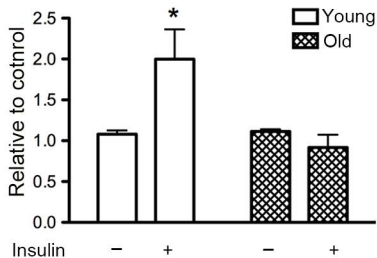

pAKT ser473

AKT

Tubulin

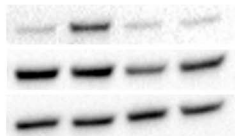

60KDa

60KDa

50kDa

**Supplementary Table 1.** Concentrations of VEGF (pg/ml) secretion in the conditioned media of fibroblasts isolated from each young donor after DHT treatment

| <b>Donor (Age)</b> | <b>Ethanol Control</b> | <b>40nM DHT</b> |
|--------------------|------------------------|-----------------|
| Donor 1 (30)       | 835.37±15.05           | 1114.10±70.32   |
| Donor 2 (30)       | 463.24±7.63            | 513.03±52.42    |
| Donor 3 (30)       | 175.43±22.85           | 276.86±19.08    |
| Medium only        | 10.16±0.13             |                 |

Unit is expressed as picogram of VEGF presented in milliliter of fibroblast conditioned medium. “Medium only” represents phenol-free DMEM + charcoal stripped FBS basal medium. Data presented as mean ± SD

**Supplementary Table 2.** Concentrations of VEGF145 (pg/ml) secretion in the conditioned media of fibroblasts isolated from each young donor after DHT treatment

| <b>Donor (Age)</b>         | <b>Ethanol Control</b> | <b>40nM DHT</b> |
|----------------------------|------------------------|-----------------|
| Donor 1 (30)               | 45.13±7.55             | 59.82±3.83      |
| Donor 2 (30)               | 62.19±7.55             | 71.72±9.22      |
| Donor 3 (24)               | 52.61±9.71             | 75.02±6.15      |
| Donor 4 (31)               | 76.88±2.78             | 88.10±7.27      |
| <b>Average of 4 donors</b> | 52.9±13.70             | 73.7±11.63      |

Unit is expressed as picogram of VEGF presented in milliliter of fibroblast conditioned medium. Data presented as mean ± SD

**Supplementary Table 3** Nuclear fluorescence intensity of young and old fibroblasts after 6 h DHT treatment.

|                | <b>Young</b>     |                  | <b>Old</b>       |                  |
|----------------|------------------|------------------|------------------|------------------|
|                | <b>Control</b>   | <b>DHT</b>       | <b>Control</b>   | <b>DHT</b>       |
| Donor 1        | 57.33            | 73.04            | 67.41            | 60.36            |
| Donor 2        | 33.56            | 66.77            | 56.13            | 54.15            |
| Donor 3        | 56.26            | 70.55            | 47.21            | 56.93            |
| Mean $\pm$ SEM | 48.72 $\pm$ 6.00 | 70.12 $\pm$ 2.71 | 56.92 $\pm$ 4.64 | 57.14 $\pm$ 2.64 |

Data represent average fluorescence intensity per pixel of all nuclei measured in each image taken for each donor.
